# Supplementary material
Source: publisher figshare collection journal article supplement (https://sage.figshare.com/ndownloader/files/15449849)
Supplement: Supplementary file 1 [file 15449849]

| Article            | Total patients (n) | Treated Patients (n) | Treatment                                                                                                                                                | Postoperative outcome                                                                 |
|--------------------|--------------------|----------------------|----------------------------------------------------------------------------------------------------------------------------------------------------------|---------------------------------------------------------------------------------------|
| Garrod AE, 1893    | 2                  | NR                   | NR                                                                                                                                                       | NR                                                                                    |
| Garrod AE, 1904    | 9                  | NR                   | NR                                                                                                                                                       | NR                                                                                    |
| Weber F, 1938      | 1                  | NR                   | NR                                                                                                                                                       | NR                                                                                    |
| Coste F, 1942      | 2                  | NR                   | NR                                                                                                                                                       | NR                                                                                    |
| Lagier R, 1975     | 4                  | NR                   | NR                                                                                                                                                       | NR                                                                                    |
| Mikkelsen OA, 1977 | 385                | NR                   | NR                                                                                                                                                       | NR                                                                                    |
| Hueston JT, 1982   | 1                  | 1                    | Nodule excision preserving the extensor apparatus<br>Knuckle pad excision ; release of the central slip from the lateral slips and posterior capsulotomy | Recovery of full flexion and extension of the DIP joint                               |
| Addison A, 1984    | 1                  | 1                    | Knuckle pad excision with skin graft on paratenon (cases 1 and 2); nodule excision (case 3)                                                              | Almost full flexion of the PIP joint was possible 2 weeks after surgery               |
| Hueston JT, 1984   | 3                  | 3                    |                                                                                                                                                          | No recurrence for cases 1 and 2; Recovery of full flexion of the DIP joint for case 3 |

| Iselin F, 1988     | 9 knuckle pads | 9  | Knuckle pad excision without skin graft (skin excision in 7 treated hands) | No recurrence after 12 months; 1 post-operative moderate stiffness, 8 recoveries of full mobility                                                                                                         |    |
|--------------------|----------------|----|----------------------------------------------------------------------------|-----------------------------------------------------------------------------------------------------------------------------------------------------------------------------------------------------------|----|
|                    | 3 nodules      | 3  | Nodule excision preserving the extensor apparatus                          | No recurrence after 12 months; recovery of full mobility for all patients                                                                                                                                 |    |
|                    |                |    | Section of the infiltrated transverse retinacular ligaments                |                                                                                                                                                                                                           |    |
| Kuhlmann JN, 1988  | 12             | 12 |                                                                            | Recovery of full mobility for 7 patients, 4 had a deficit of 10° of extension at the PIP joint or flexion at the DIP joint, 1 patient presented trophic changes and the finger was ankylosed in extension |    |
| Caroli A, 1991     | 54             | 12 | Knuckle pad excision                                                       | Follow up for 9 patients: 7 had good results, 1 had moderate stiffness, 1 had a recurrence in the index finger after 6 months                                                                             |    |
| Irwin LR, 1997     | 8              | 8  | Knuckle pad excision                                                       |                                                                                                                                                                                                           | NR |
|                    |                |    | Oblique cord parallel to the oblique retinacular ligament excised.         |                                                                                                                                                                                                           |    |
| Boyce DE, 2004     | 1              | 1  |                                                                            | Recovery of full flexion of the PIP joint                                                                                                                                                                 |    |
| Abe Y, 2004        | 14             | NR | NR                                                                         |                                                                                                                                                                                                           | NR |
| Rayan GM, 2010     | 15             | NR | NR                                                                         |                                                                                                                                                                                                           | NR |
| Tamborrini G, 2012 | 1              | 1  | Knuckle pad biopsy                                                         |                                                                                                                                                                                                           | NR |

---

NR : not reported ; PIP : proximal interphalangeal ; DIP : distal interphalangeal

---
